# Supplementary material
Source: PubMed Central journal article supplement (PMC2856642)

**Supplementary Table 1.**

| <b>Day</b> | <b>Average (n=3) Fold Dysferlin Protein Induction (Dex / No Dex) Relative to GAPDH</b> |
|------------|----------------------------------------------------------------------------------------|
| Day 1      | 2.57 ± 0.26*                                                                           |
| Day 2      | 1.54 ± 0.06*                                                                           |
| Day 3      | 1.70 ± 0.04*                                                                           |
| Day 4      | 1.37 ± 0.10*                                                                           |
| Day 5      | 1.03 ± 0.08                                                                            |
| Day 6      | 0.90 ± 0.02                                                                            |
| Day 7      | 1.04 ± 0.03                                                                            |

## Supplementary Figure 3

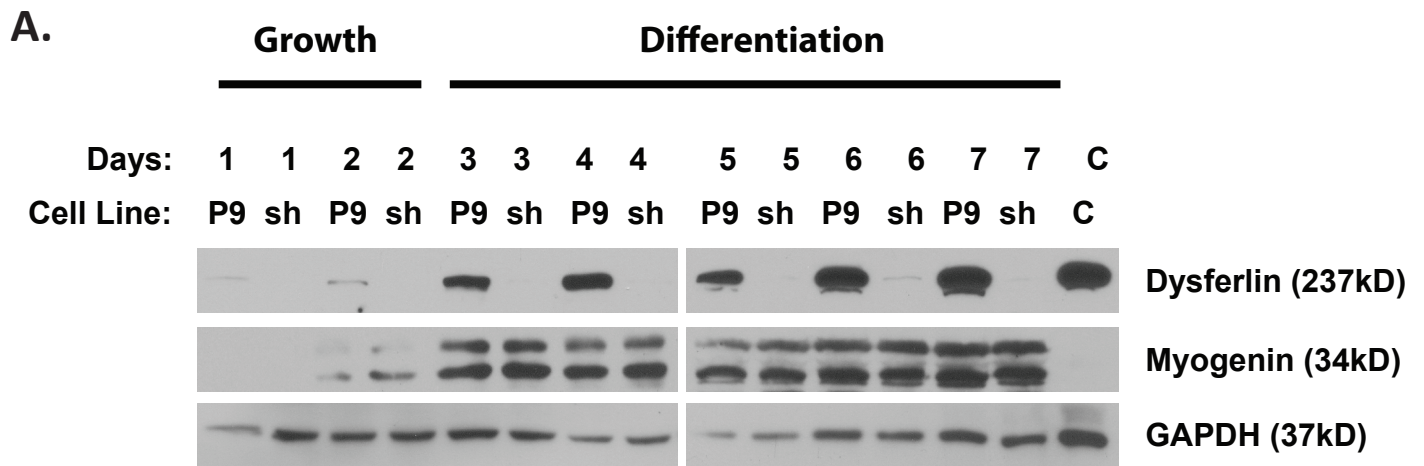

Supplemental Figure 2  
Supplementary Figure 2A

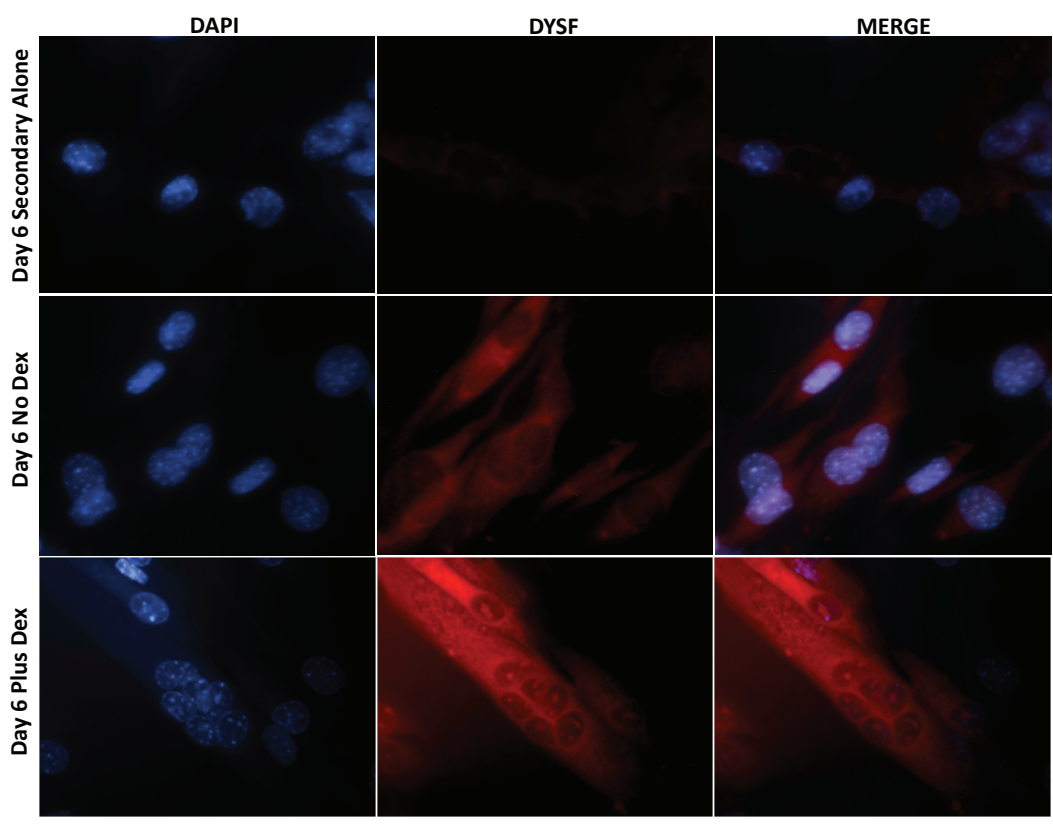

Supplementary Figure 2B

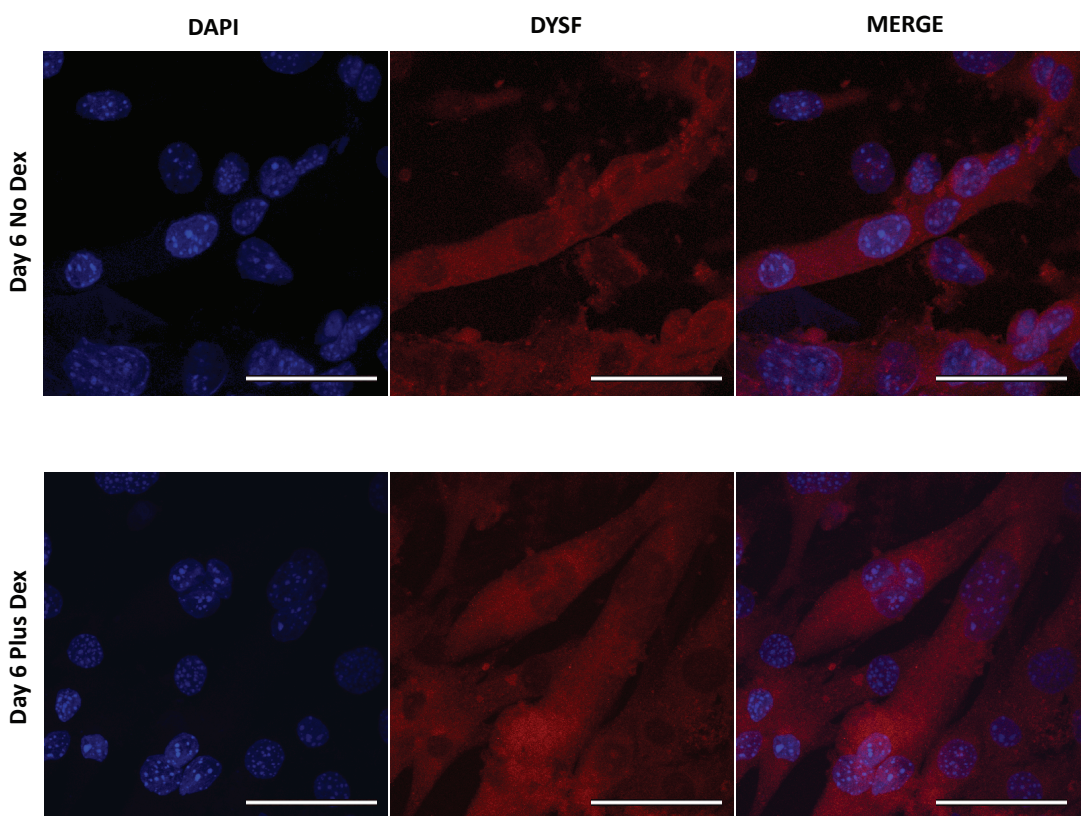

# Supplemental Figure 1

A. C2C12 Myoblasts in Proliferation Media, 10X Magnification

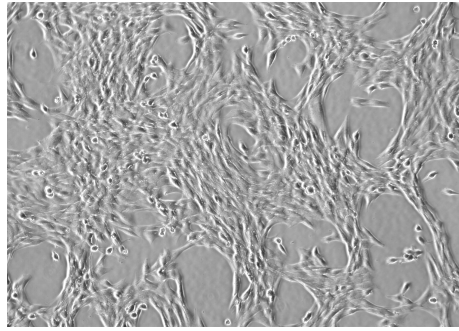

B. C2C12 Culture Day 5, Vehicle Control, 10X

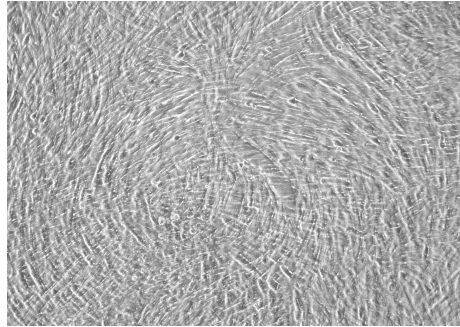

C. C2C12 Culture Day 5, 100nM Dexamethasone, 10X

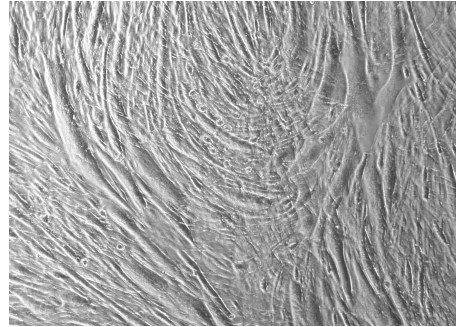

D. C2C12 Culture Day 6, Vehicle Control, 10X

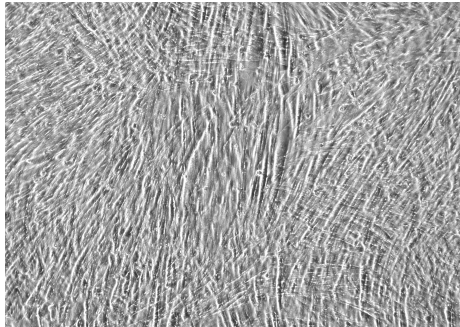

E. C2C12 Culture Day 6, 100nM Dexamethasone, 10X

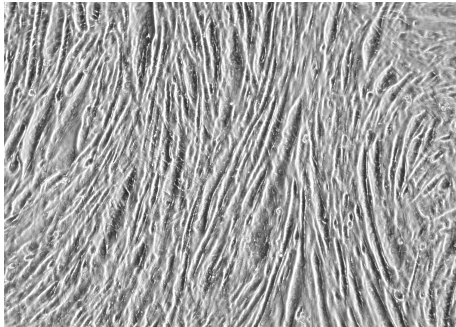

F. C2C12 Culture Day 7, Vehicle Control, 10X

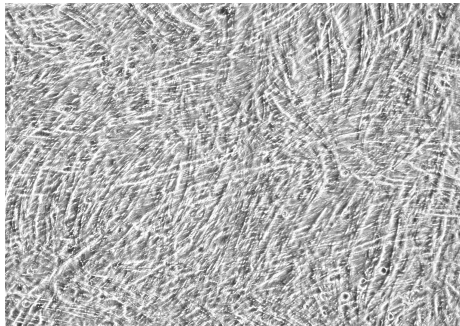

G. C2C12 Culture Day 7, 100nM Dexamethasone, 10X

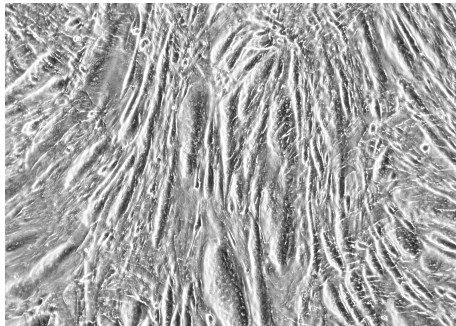

Supplement: NIHMS171229-supplement-01.pdf [file NIHMS171229-supplement-01.pdf]
